# Supplementary material for: Pentraxin-3-mediated complement activation in a swine model of renal ischemia/reperfusion injury
Source: publisher site journal article supplement (doi:10.18632/aging.202992), 2021-04-20
Supplement: Supplementary file [file aging-v13i8-202992-supplementary-material-SD1.pdf]

## SUPPLEMENTARY FIGURE

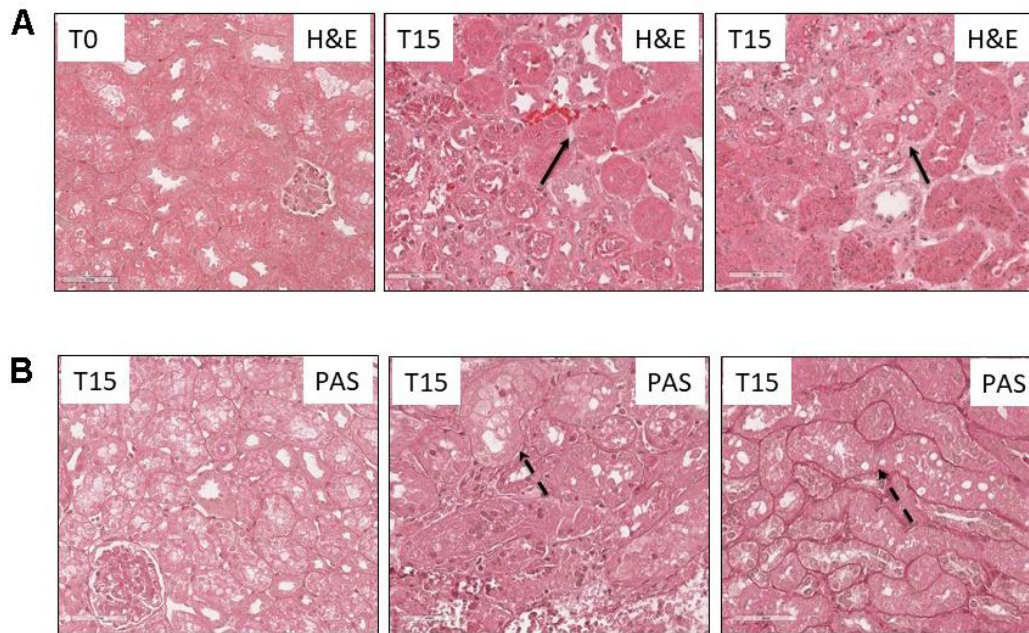

**Supplementary Figure 1. Modulation of early tubulointerstitial damage in a swine model of I/R injury.** Compared with basal conditions, 30 min of warm ischemia followed by 15 min of reperfusion induced capillary congestion (A, black arrows, H&E staining) and focal vacuolization at the tubulointerstitial level (B, dotted arrows, periodic acid-Schiff (PAS) staining). Magnification 20X.
